# Supplementary material for: Lipopolysaccharide Preconditioning Restricts Microglial Overactivation and Alleviates Inflammation-Induced Depressive-like Behavior in Mice
Source: MDPI journal article supplement (doi:10.3390/brainsci13040549), 2023-03-25
Supplement: s1 [file s1]

## Supplementary Material

### 1 Supplementary Figures and Tables

#### 1.1 Supplementary Figures

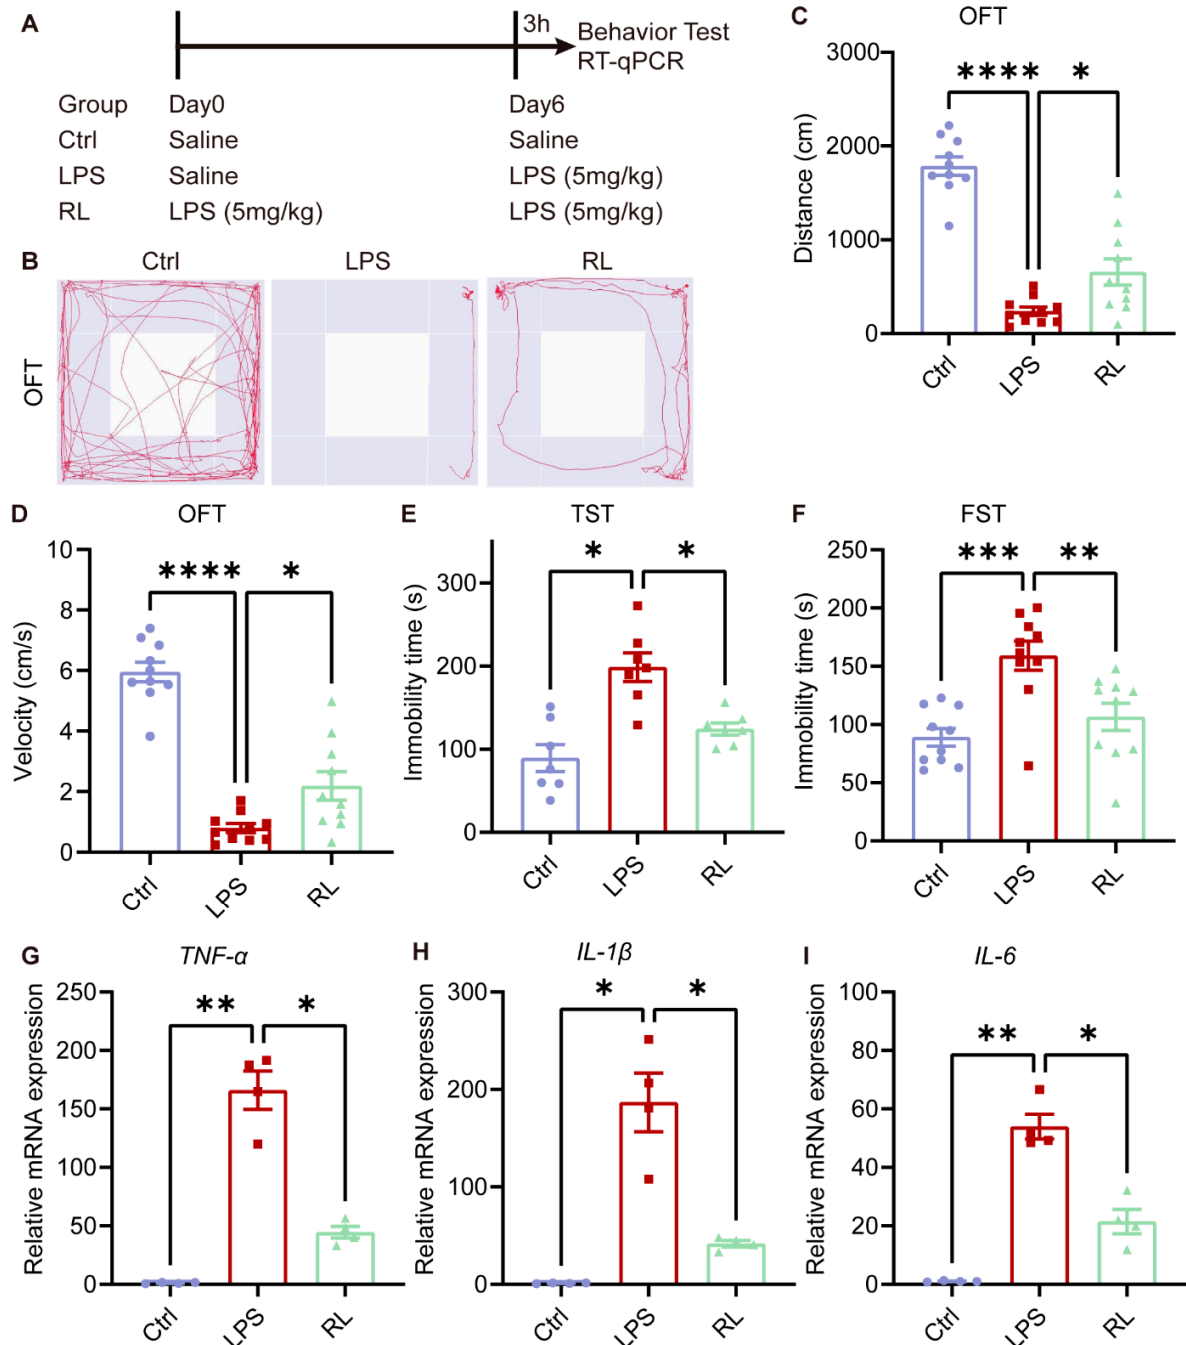

**Supplementary Figure S1.** Repeated stimulation with 5 mg/kg LPS suppressed the inflammatory response in the brain. **(A)** Schematic of experiments testing the effects of repeated 5 mg/kg LPS treatment on mouse behavior. Mice were repeatedly intraperitoneally injected with 5 mg/kg LPS at an

interval of 6 days, and behavioral tests were performed 3 h after the second injection (n=7-10). Total distance traveled (**B**, **C**) and velocity (**D**) in the OFT and immobility time in the TST (**E**) and FST (**F**). (**G-I**) mRNA expression levels of *TNF- $\alpha$* , *IL-1 $\beta$* , and *IL-6* in the mouse hippocampus were measured (n=4). The data are presented as the mean  $\pm$  SEM; one-way ANOVA, ns indicates no significance, \* $p$  < 0.1, \*\* $p$  < 0.01, \*\*\* $p$  < 0.001, \*\*\*\* $p$  < 0.0001.

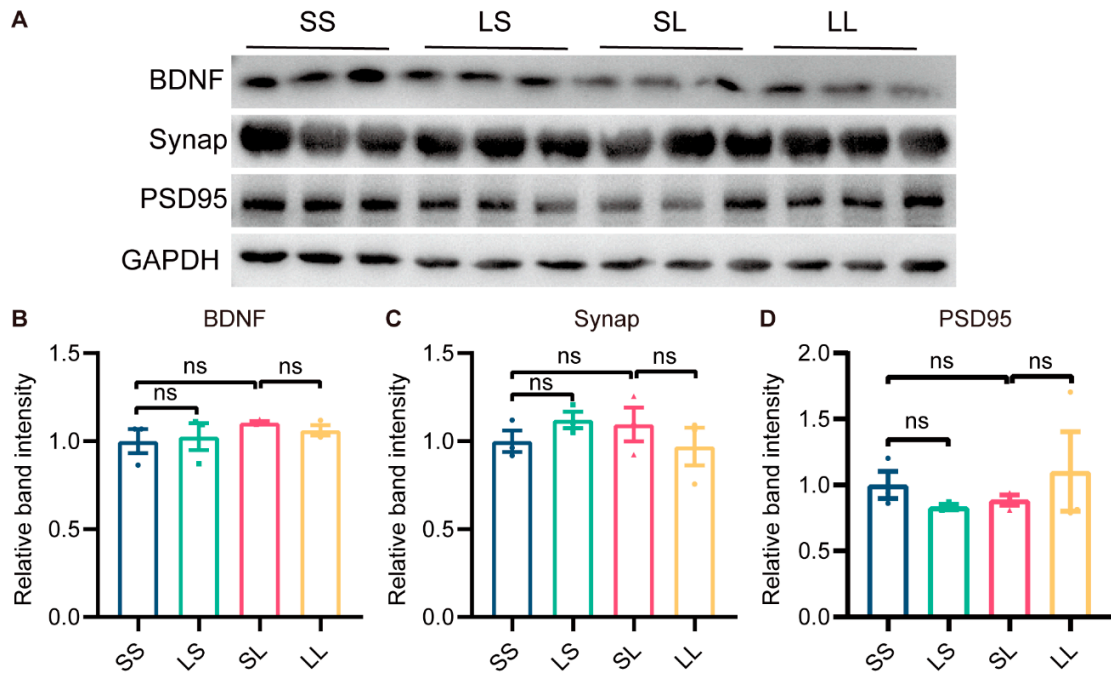

**Supplementary Figure S2.** The protein expression of BDNF and synapse-associated proteins. (**A**) Representative western blots of BDNF, Synap, PSD95 and the normalization control GAPDH in the hippocampus (n=3). (**B-D**) Statistical analysis showed that neither low-dose nor high-dose LPS had an effect on hippocampal BDNF, synap, and PSD95 protein expression. The data are presented as the mean  $\pm$  SEM; one-way ANOVA, ns indicates no significance.

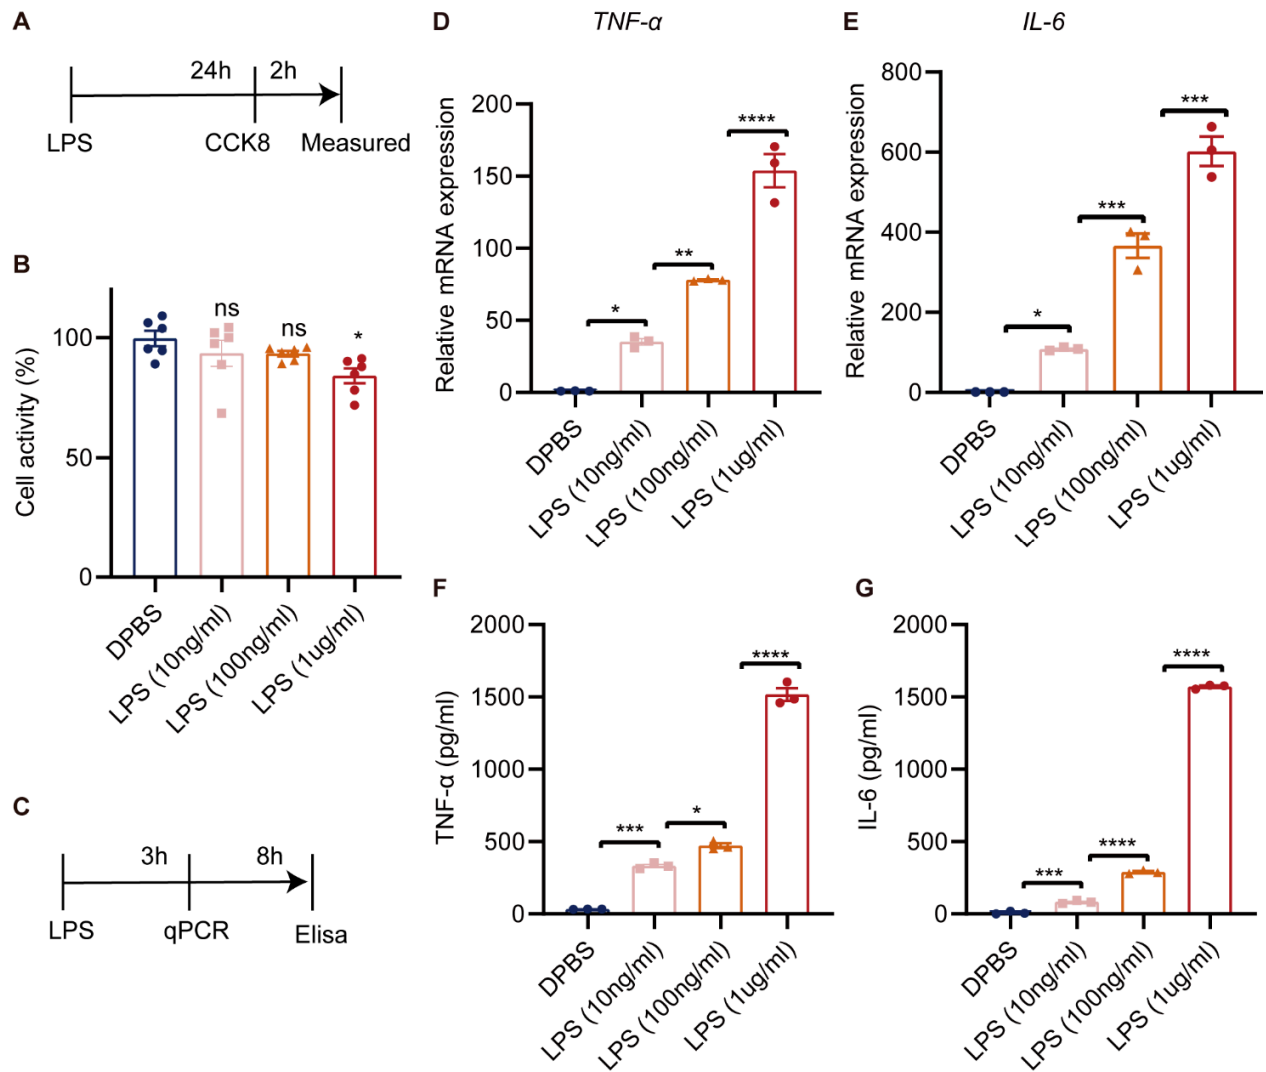

**Supplementary Figure S3.** The inflammatory response induced by LPS in BV2 microglia was dose-dependent. **(A)** Schematic diagram of the CCK8 assay. **(B)** Cell viability was quantified using the CCK8 assay (n=6). **(C)** Schematic diagram of the LPS stimulation experiment. **(D, E)** mRNA expression levels of *TNFα* and *IL-6* in BV2 microglia (n=3). **(F, G)** Protein levels of *TNFα* and *IL-6* in the cell culture supernatant (n=3). The data are presented as the mean ± SEM; one-way ANOVA, ns indicates no significance, \* $p < 0.1$ , \*\* $p < 0.01$ , \*\*\* $p < 0.001$ , \*\*\*\* $p < 0.0001$ .

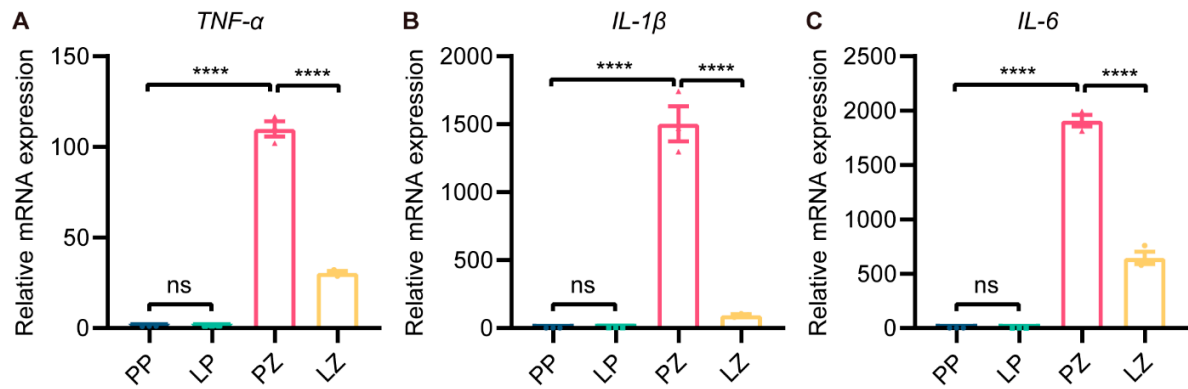

**Supplementary Figure S4.** Low-dose LPS pretreatment induced a tolerance-like response to subsequent zym challenge in BV2 microglia. The mRNA expression of *TNF-α* (A), *IL-1β* (B) and *IL-6* (C) was quantified 3 h after the second stimulation. The data are presented as the mean  $\pm$  SEM; one-way ANOVA, ns indicates no significance, \*\*\*\* $p < 0.0001$ .

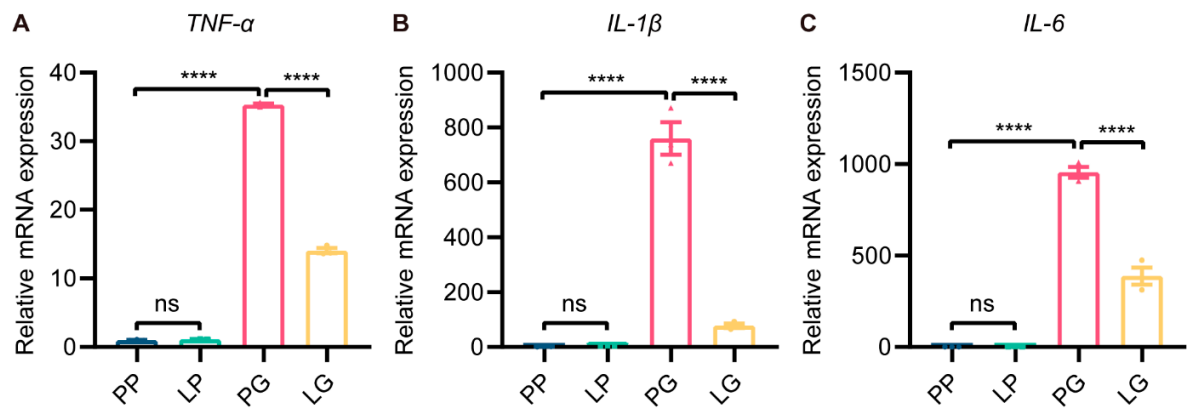

**Supplementary Figure S5.** Low-dose LPS pretreatment induced a tolerance-like response to subsequent  $\beta$ -Glu challenge in BV2 microglia. The mRNA expression of *TNF-α* (A), *IL-1β* (B) and *IL-6* (C) was quantified 3 h after the second stimulation. The data are presented as the mean  $\pm$  SEM; one-way ANOVA, ns indicates no significance, \*\*\*\* $p < 0.0001$ .

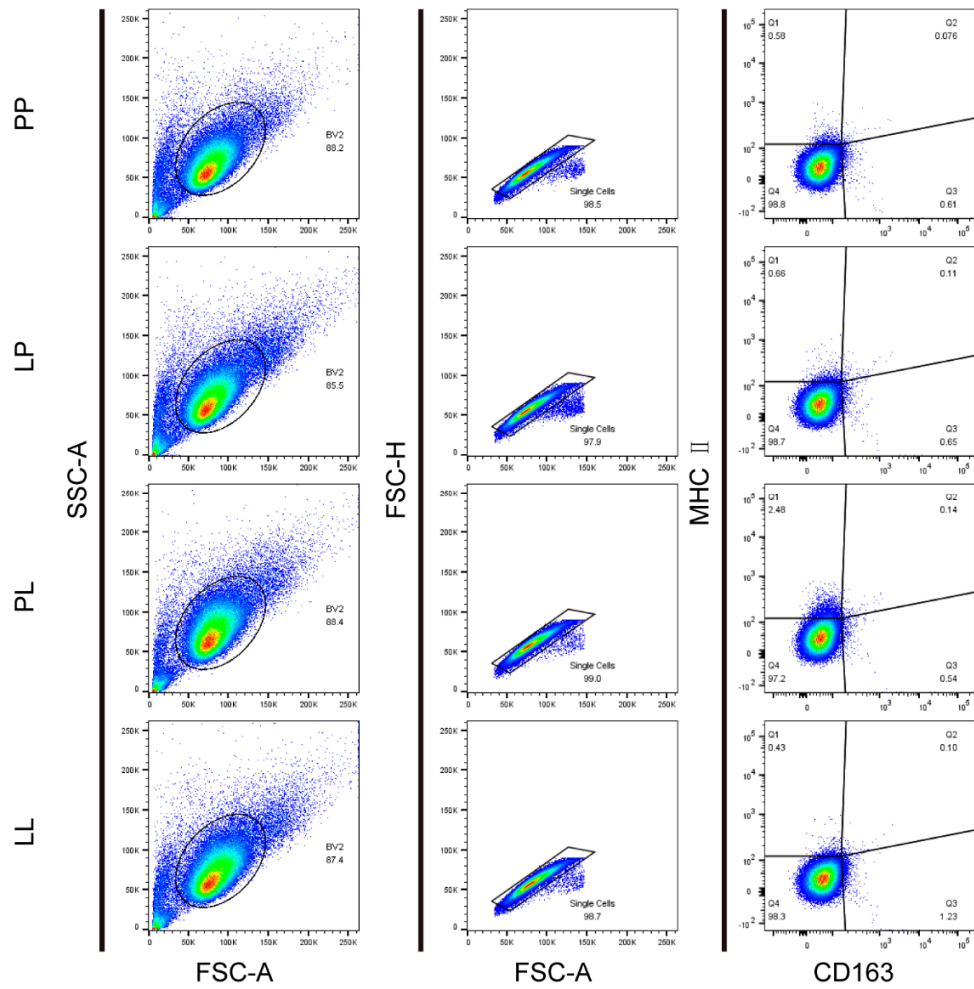

**Supplementary Figure S6.** Low-dose LPS pretreatment promoted phenotypic transition in BV2 microglia. Representative flow cytometry gating strategy for assessing microglial polarization. MHC II and CD163 were used to identify M1 and M2 microglia, respectively.

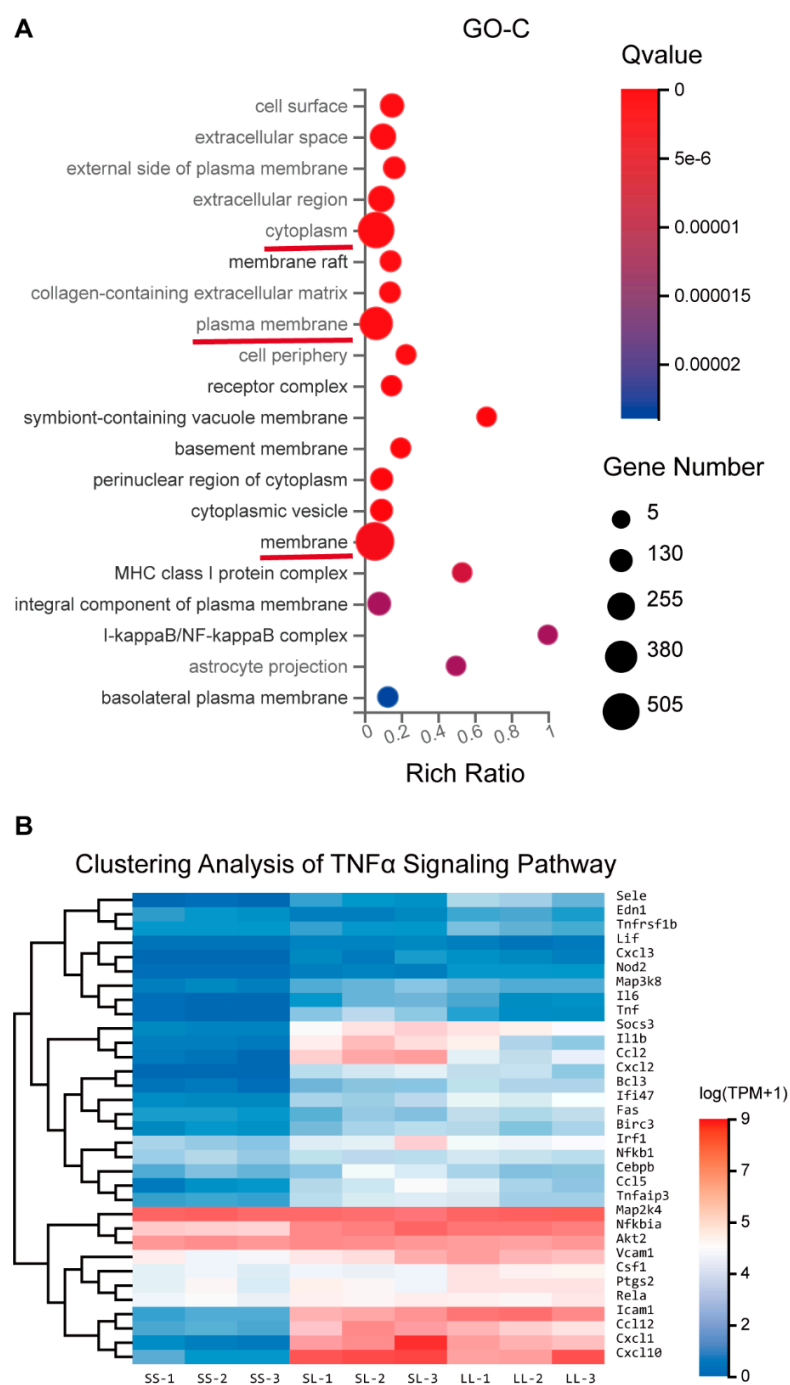

**Supplementary Figure S7.** Transcriptional profile changes in tolerance-like mice. **(A)** GO-C enrichment analysis of differentially expressed genes between the SL and LL groups. **(B)** Heatmap showing the expression of genes of interest in the SS, SL and LL groups.

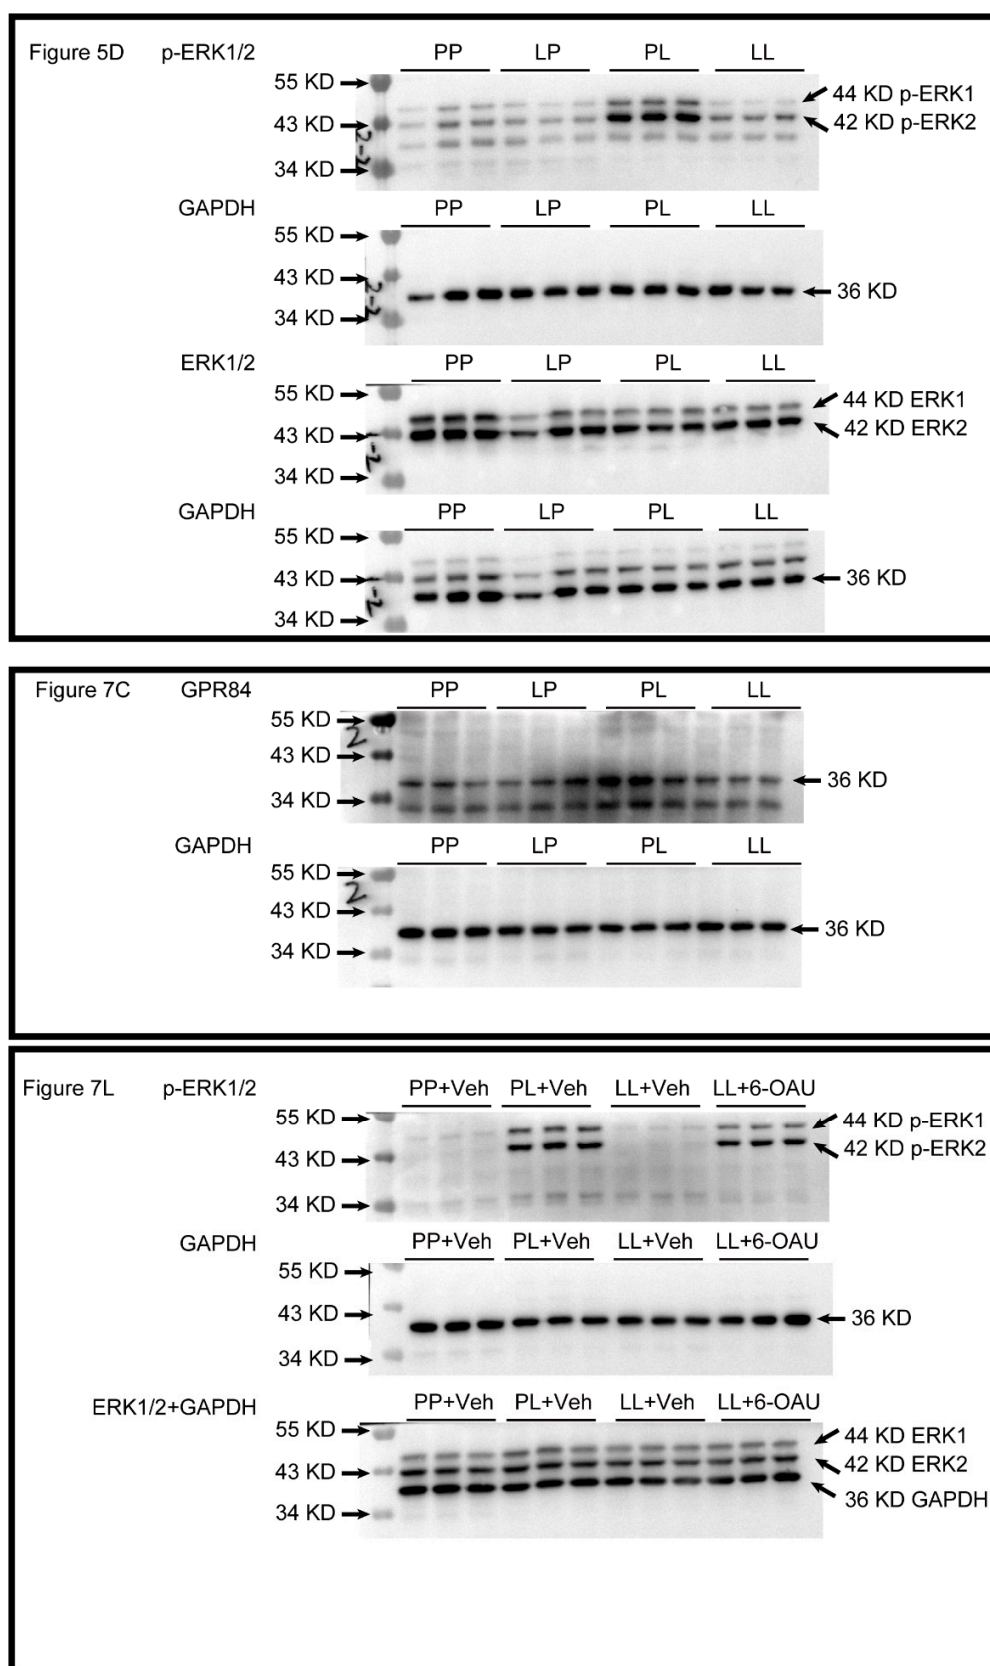

**Supplementary Figure S8.** Raw images of the western blot in Figure 5D, Figure 7D and Figure 7L.

## 1.2 Supplementary Tables

**Supplementary Table S1. Primary antibody used in WB.**

| Primary antibody | Dilution | Molecular Weight (kDa) | Host Species | Catalogo  | Company  |
|------------------|----------|------------------------|--------------|-----------|----------|
| p-ERK1/2         | 1/1000   | 42/44                  | Rabbit       | AF1891    | Beyotime |
| ERK1/2           | 1/1000   | 42/44                  | Rabbit       | AF1051    | Beyotime |
| GPR84            | 1/2000   | 36                     | Rabbit       | bs-15353R | BIOSS    |
| BDNF             | 1/10000  | 15                     | Rabbit       | ab108319  | Abcom    |
| Synap            | 1/20000  | 34                     | Rabbit       | ab32127   | Abcom    |
| PSD95            | 1/2000   | 95                     | Goat         | ab12093   | Abcom    |
| GAPDH            | 1/2000   | 36                     | Rabbit       | 30202ES40 | Yeasten  |

**Supplementary Table S2. Secondary antibody used in WB.**

| Secondary Antibody | Dilution | Catalogy  | Company     |
|--------------------|----------|-----------|-------------|
| Rabbit anti Goat   | 1/5000   | SA00001-4 | Proteintech |
| Goat anti Rabbit   | 1/5000   | ZB-5301   | ZSGB-Bio    |

**Supplementary Table S3. Primers used in qPCR.**

| Gene                           | Forward                 | Reverse                 | Host  |
|--------------------------------|-------------------------|-------------------------|-------|
| <i>TNF-<math>\alpha</math></i> | GACCCTCACACTCAGATCATCTT | CCTCCACTTGGTGGTTTGCT    | Mouse |
| <i>IL-1<math>\beta</math></i>  | CTGGTGTGTGACGTTCCCATTA  | CCGACAGCACGAGGCTTT      | Mouse |
| <i>IL-6</i>                    | GCTGGTGACAACCACGGCCT    | CTCTCTGAAGGACTCTGGCTTTG | Mouse |
| <i>IDO1</i>                    | TGGCGTATGTGTGGAACCG     | CTCGCAGTAGGGAACAGCAA    | Mouse |
| <i>CXCL2</i>                   | CCAACCACCAGGCTACAGG     | GCGTCACACTCAAGCTCTG     | Mouse |
| <i>CCL2</i>                    | GGAATGGGTCCAGACATACATTA | CTACAGAAGTGCTTGAGGTGGT  | Mouse |
| <i>CCL5</i>                    | TTTGCCTACCTCTCCCTCG     | CGACTGCAAGATTGGAGCACT   | Mouse |
| <i>GPR84</i>                   | GGTGCCAGTTGTCTGCACTT    | GCTGAGCCCAAGCACAAAG     | Mouse |
| <i>GAPDH</i>                   | AATGTGTCCGTCGTGGATCTGA  | GATGCCTGCTTCACCACCTTCT  | Mouse |
