# Supplementary material for: Lipopolysaccharide Preconditioning Restricts Microglial Overactivation and Alleviates Inflammation-Induced Depressive-like Behavior in Mice
Source: Brain Sci. 2023 Mar 25;13(4):549. doi: 10.3390/brainsci13040549 (PMC10137116; doi:10.3390/brainsci13040549)
Supplement: Supplementary file 1 [file brainsci-13-00549-s001.zip]

Archive with 10 entries (10 files):
- brainsci-2271554-Supplementary Material.pdf
- SUPPLEMENTARY FIGURE 1.tif
- SUPPLEMENTARY FIGURE 2.tif
- SUPPLEMENTARY FIGURE 3.tif
- SUPPLEMENTARY FIGURE 4.tif
- SUPPLEMENTARY FIGURE 5.tif
- SUPPLEMENTARY FIGURE 6.tif
- SUPPLEMENTARY FIGURE 7.tif
- SUPPLEMENTARY FIGURE 8.tif
- Table s4.xlsx
