# Supplementary material for: Lipopolysaccharide Preconditioning Restricts Microglial Overactivation and Alleviates Inflammation-Induced Depressive-like Behavior in Mice
Source: Brain Sci. 2023 Mar 25;13(4):549. doi: 10.3390/brainsci13040549 (PMC10137116; doi:10.3390/brainsci13040549)
Supplement: Supplementary file 1 [file brainsci-13-00549-s001.zip › Table s4.xlsx]

## Sheet: Figure 1
OFT	Distance (cm)	Velocity (cm/s)		TST	Immobility time (s)		FST	Immobility time (s)
Saline-1	2625.05	9.0669		Saline-1	118		Saline-1	172.96
Saline-2	2278.6	7.61767		Saline-2	117.2		Saline-2	178.55
Saline-3	2225.93	7.45957		Saline-3	112.2		Saline-3	98.76
Saline-4	2246.46	7.54453		Saline-4	116.77		Saline-4	163.58
Saline-5	2586.99	8.68119		Saline-5	125.03		Saline-5	129.63
Saline-6	2224.81	7.41603		Saline-6	117.1		Saline-6	174.2
Saline-7	1853.39	6.20445		Saline-7	133.4		Saline-7	78.4
Saline-8	2320.53	7.73511		Saline-8	107.17		Saline-8	50.57
LPS(10ug/kg)-1	2472.07	8.24462		LPS(10ug/kg)-1	124.27		LPS(10ug/kg)-1	160.77
LPS(10ug/kg)-2	2120.23	7.06744		LPS(10ug/kg)-2	117.7		LPS(10ug/kg)-2	136.13
LPS(10ug/kg)-3	2269.71	7.57379		LPS(10ug/kg)-3	130.87		LPS(10ug/kg)-3	156.07
LPS(10ug/kg)-4	1924.17	6.41391		LPS(10ug/kg)-4	109.87		LPS(10ug/kg)-4	164.33
LPS(10ug/kg)-5	2136.27	7.12659		LPS(10ug/kg)-5	101.7		LPS(10ug/kg)-5	118.55
LPS(10ug/kg)-6	2622.41	8.74136		LPS(10ug/kg)-6	108.73		LPS(10ug/kg)-6	154.69
LPS(10ug/kg)-7	2146.88	7.16391		LPS(10ug/kg)-7	118.8		LPS(10ug/kg)-7	146.7
LPS(10ug/kg)-8	2246.4	7.48801		LPS(10ug/kg)-8	108.33		LPS(10ug/kg)-8	146.65
LPS(1mg/kg)-1	1959.8	6.53267		LPS(1mg/kg)-1	158.13		LPS(1mg/kg)-1	175.6
LPS(1mg/kg)-2	2598.41	8.66136		LPS(1mg/kg)-2	165.79		LPS(1mg/kg)-2	192.97
LPS(1mg/kg)-3	2671.61	8.92204		LPS(1mg/kg)-3	150.39		LPS(1mg/kg)-3	151.17
LPS(1mg/kg)-4	1994.05	6.65392		LPS(1mg/kg)-4	122.54		LPS(1mg/kg)-4	178.77
LPS(1mg/kg)-5	2500.84	8.34728		LPS(1mg/kg)-5	192.4		LPS(1mg/kg)-5	147.1
LPS(1mg/kg)-6	2344.22	7.81408		LPS(1mg/kg)-6	158.17		LPS(1mg/kg)-6	180.66
LPS(1mg/kg)-7	2219.71	7.40892		LPS(1mg/kg)-7	196.23		LPS(1mg/kg)-7	213.7
LPS(1mg/kg)-8	2569.91	8.61924		LPS(1mg/kg)-8	207.1		LPS(1mg/kg)-8	174.66
LPS(5mg/kg)-1	2087.15	6.994		LPS(5mg/kg)-1	227.37		LPS(5mg/kg)-1	184.03
LPS(5mg/kg)-2	2047.4	6.88		LPS(5mg/kg)-2	208.1		LPS(5mg/kg)-2	161.54
LPS(5mg/kg)-3	1992.76	6.643		LPS(5mg/kg)-3	197.53		LPS(5mg/kg)-3	170.6
LPS(5mg/kg)-4	1632.6	5.565		LPS(5mg/kg)-4	189.63		LPS(5mg/kg)-4	195.6
LPS(5mg/kg)-5	1981.24	6.638		LPS(5mg/kg)-5	128.4		LPS(5mg/kg)-5	153.53
LPS(5mg/kg)-6	1857.4	6.191		LPS(5mg/kg)-6	128.93		LPS(5mg/kg)-6	200.4
LPS(5mg/kg)-7	1840.45	6.135		LPS(5mg/kg)-7	272.37		LPS(5mg/kg)-7	176.24
LPS(5mg/kg)-8	1837.36	6.258		LPS(5mg/kg)-8	165.17		LPS(5mg/kg)-8	184.27

## Sheet: Figure 2
OFT					TST			FST
SS	Distance moved(cm)	Velocity(cm/s)	In Center(s)		SS	Immobility Time (s)		SS	Immobility Time (s)
1	2039.87	6.79666	15.5196		1	115		1	173.862
2	2548.86	8.49227	35.2957		2	117.1		2	180.346
3	2498.57	8.3248	11.0142		3	52.1999		3	101.156
4	2616.97	8.71921	15.7704		4	116.9		4	167.175
5	2034.05	6.78018	7.52		5	125.233		5	134.433
6	1504.93	5.01643	10.24		6	127.1		6	179.6
7	1687.6	5.62534	29.92		7	163.4		7	84.6999
8	2014.55	6.71516	11.36		8	57.6666		8	57.7666
LS	Distance moved(cm)	Velocity(cm/s)	In Center(s)		LS			LS
1	1940.2	6.46735	5.6		1	175.166		1	181.666
2	2182.22	7.27406	10.08		2	169.5		2	137.933
3	2444.92	8.14975	13.28		3	143.567		3	158.767
4	1471.83	4.90611	13.92		4	113.467		4	167.933
5	1880.17	6.26722	12		5	106.2		5	123.055
6	2795.42	9.31807	6.88		6	114.133		6	170.091
7	2740.41	9.13471	14.72		7	125.1		7	153.003
8	2761.19	9.20397	5.92		8	105.533		8	153.851
SL	Distance moved(cm)	Velocity(cm/s)	In Center(s)		SL			SL
1	2329.27	7.76069	7.25935		1	159.034		1	176.5
2	2239.74	7.46252	13.0166		2	167.586		2	194.766
3	3116	10.3821	8.51083		3	153.586		3	143.867
4	2645.6	8.81468	12.0154		4	126.138		4	182.366
5	2133.01	7.11003	18		5	196.9		5	151.596
6	1835.64	6.11882	11.68		6	164.167		6	186.062
7	2504.56	8.34853	6.48		7	202.533		7	276.681
8	2198.84	7.32947	10.88		8	214.3		8	181.856
LL	Distance moved(cm)	Velocity(cm/s)	In Center(s)		LL			LL
1	1942.34	6.47445	12.16		1	134.933		1	151.333
2	2205.37	7.35124	4.96		2	145.533		2	136.033
3	1674.21	5.58069	26.64		3	154.833		3	125.567
4	1302.69	4.34231	43.28		4	158.633		4	146.133
5	1789.79	5.96595	28.4		5	155.366		5	175.655
6	2631.76	8.77253	25.68		6	81.0333		6	122.655
7	1695.58	5.65192	8		7	85.2332		7	118.31
8	2262.25	7.54083	15.28		8	126.3		8	124.172
